# Supplementary material for: A tetra-layer microfluidic system for peptide affinity screening through integrated sample injection
Source: Royal Society of Chemistry journal article supplement (doi:10.1039/c3an00463e), 2013-01-01
Supplement: c3an00463e.pdf [file c3an00463e.pdf]

## A Tetra-layer Microfluidic System for Peptide Affinity Screening through Integrated Sample Injection

Weizhi Wang, Yanyan Huang, Yulong Jin, Guoquan Liu, Yi Chen, Huimin Ma and Rui Zhao\*  
*Beijing National Laboratory for Molecular Sciences, Key Laboratory of Analytical Chemistry for Living Biosystems, Institute of Chemistry, Chinese Academy of Sciences, Beijing, 100190, China*

*Tel: +86-10-62557910; Fax: +86-10-62559373; E-mail: zhaorui@iccas.ac.cn*

### 1. Solid phase synthesis and characterization of candidate peptides

Six candidate peptides, i.e. YGGFL, YGGFE, YGGFK, YGGFF, YGGFS and YGGFG were synthesized by solid-phase Fmoc strategy (Figure S-1). All the peptides were analyzed using RP-HPLC and MALDI-TOF-MS. As shown in the chromatogram in figure S-2, the purities of the six peptide are SP-L 91.4%, SP-E 93.2%, SP-K 92.3%, SP-F 90.6%, SP-S 91.7% and SP-G 94.1%, respectively. The six peptides synthesized were characterized by MALDI-TOF MS. Table S-1 shows the peaks of each peptide in the MS spectrogram.

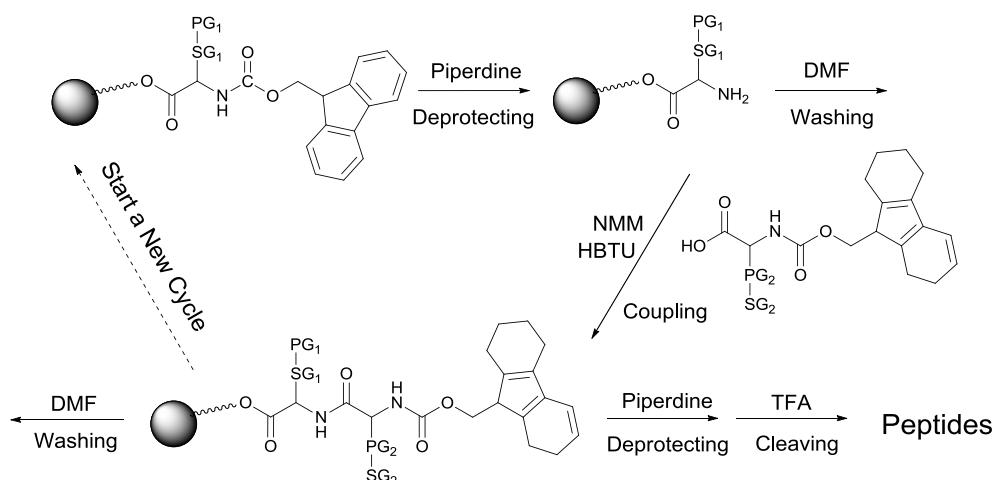

**Figure. S-1** Scheme of Fmoc SPPS cycle

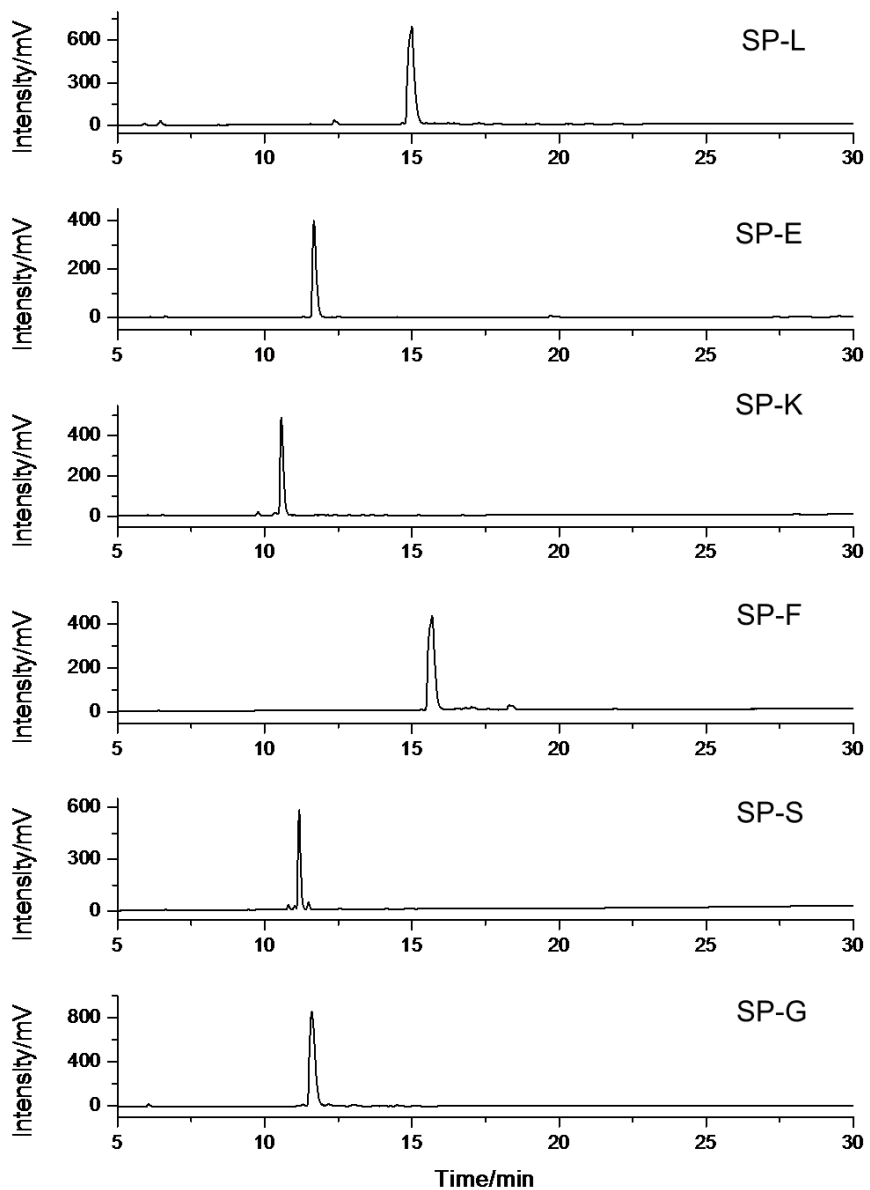

**Figure. S-2** RP-HPLC chromatograms of Six candidate peptides, Column: TSK-gel ODS-100V (150 mm × 4.6 mm i.d.); Gradient: 0–30–35 min, 5–80–80% aqueous acetonitrile containing 0.1%TFA; Flow rate: 1 mL min<sup>-1</sup>; UV: 220 nm; AUFS: 0.01

Table S-1 Peaks of each candidate peptide in the MS spectrogram

| Peptide | Sequence | M.W   | MALDI-TOF-MS detection m/z |                   |                  |
|---------|----------|-------|----------------------------|-------------------|------------------|
|         |          |       | M+H <sup>+</sup>           | M+Na <sup>+</sup> | M+K <sup>+</sup> |
| SP-L    | YGGFL    | 555.3 | 556.4                      | 578.4             | 594.4            |
| SP-E    | YGGFE    | 571.2 | 572.4                      | 594.4             | -                |
| SP-K    | YGGFK    | 570.3 | 571.4                      | -                 | -                |
| SP-F    | YGGFF    | 589.3 | -                          | 612.5             | 628.5            |
| SP-S    | YGGFS    | 529.2 | 530.3                      | 552.4             | 568.3            |
| SP-G    | YGGFG    | 499.2 | 500.1                      | 522.1             | -                |

## 2. Peptide conjugation with the magnetic beads and detection of the peptides loadings

The six candidate peptides were further conjugated to the magnetic beads respectively through the NMM/HBTU method (Figure S-1). The loadings of the peptides on the magnetic beads were calculated by comparing the peptide concentration in the reaction solution before and after conjugation. The loadings of the magnetic beads were shown in table S-2.

Table S-2 Detection of the peptide loading on the magnetic beads

| Candidate peptide | M.W.  | Loading( $\mu\text{mol/g}$ ) |
|-------------------|-------|------------------------------|
| SP-L              | 555.3 | 16                           |
| SP-E              | 571.2 | 16                           |
| SP-K              | 570.3 | 15                           |
| SP-F              | 589.3 | 20                           |
| SP-S              | 529.2 | 14                           |
| SP-G              | 499.2 | 18                           |
